# Supplementary material for: Core–shell architecture based on bio-sourced porous carbon: the shape formation mechanism at the solid/liquid interface layer
Source: Royal Society of Chemistry journal article supplement (doi:10.1039/c9ra04869c), 2019-01-01
Supplement: c9ra04869c1.pdf [file c9ra04869c1.pdf]

## Core-shell architecture based on bio-sourced porous carbon: shape formation mechanism at the solid/liquid interface layer

Anfar Zakaria <sup>a,b,c</sup> Jada Amane <sup>b,c</sup>, and El Alem Nouredine <sup>a</sup>

<sup>a</sup>Materials and environment laboratory, Ibn Zohr University, Agadir, 8000, Morocco

<sup>b</sup>Mulhouse materials science institute - CNRS, University Haute Alsace, F-68100, Mulhouse,  
France

<sup>c</sup>University of Strasbourg, Strasbourg, F-67081, France

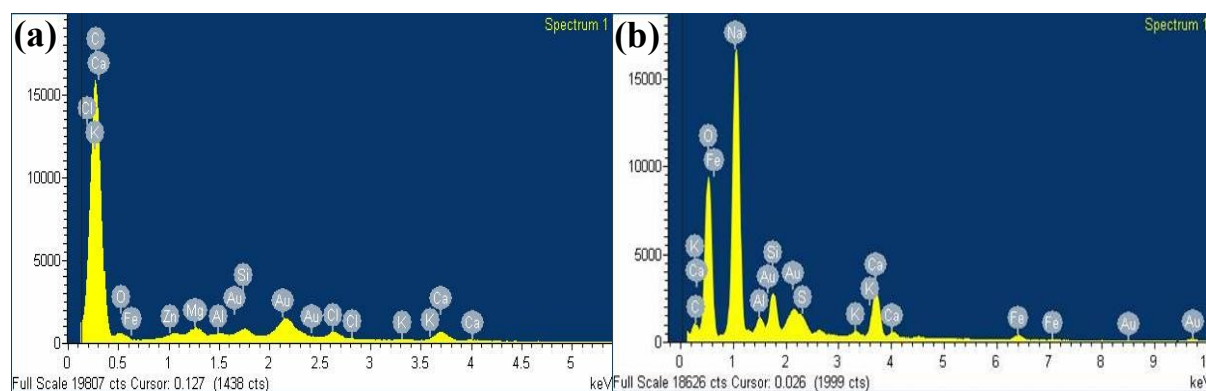

**Figure S1.** a) EDS analysis of raw digestate and b) of PC material

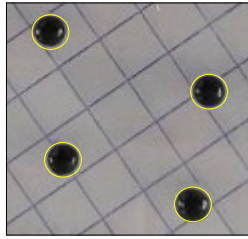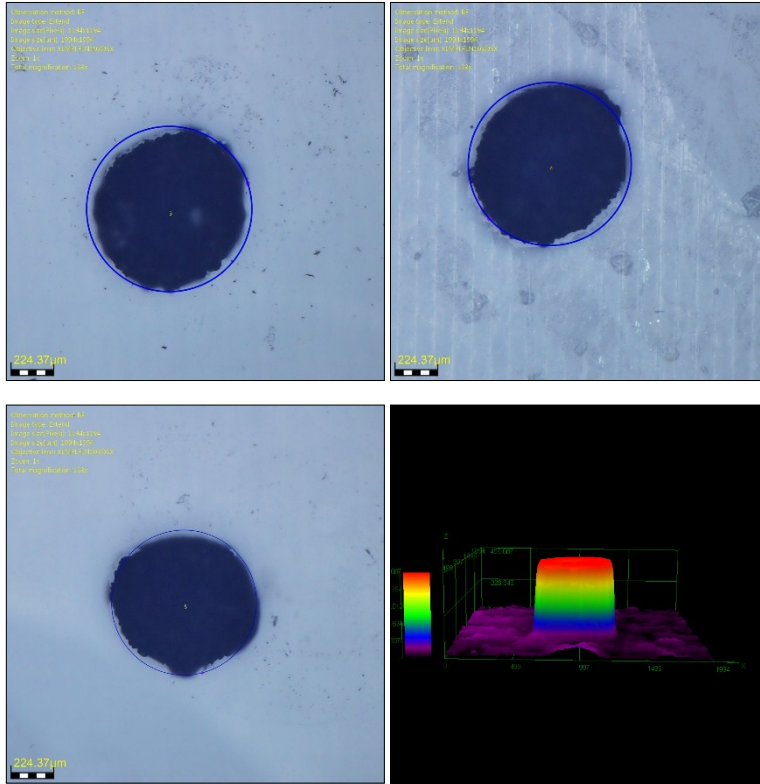

**Figure S2.** Numerical Macroscopic Images of PC@Alginate in 2D and 3D form

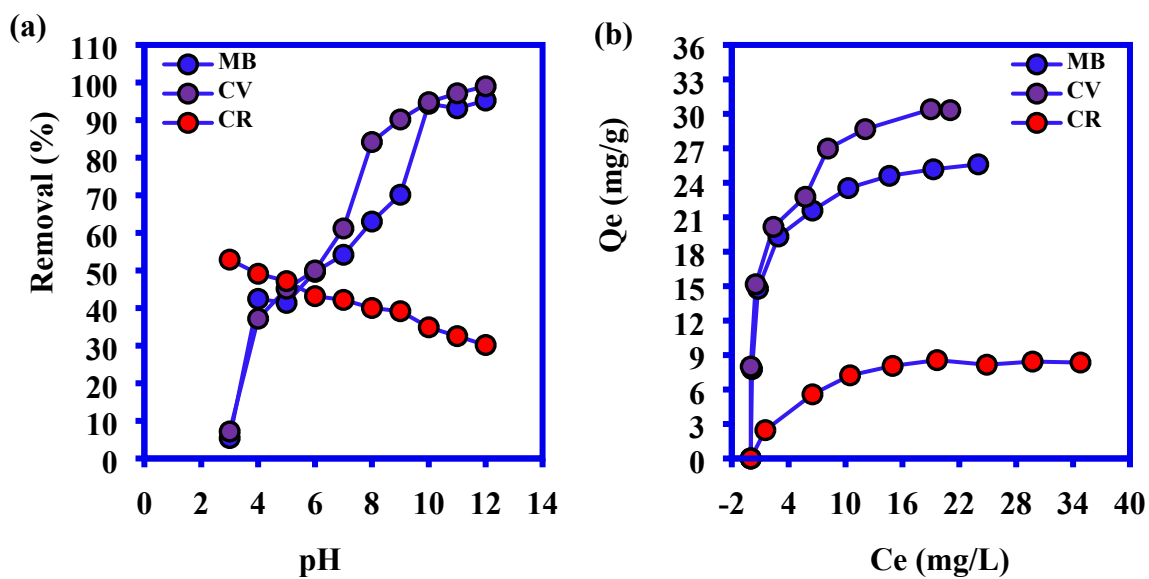

**Figure S3.** a) Effect of pH and b) adsorption isotherm of MB, CV and CR onto PC@Alginate

**Table S1.** Elementals analysis of digestate and GPC **Figure S3.**

| Elements | Digestate | GPC       |
|----------|-----------|-----------|
|          | Atomic %. | Atomic %. |
| C-K      | 42.18     | 87.44     |
| O-K      | 40.78     | 10.22     |
| Na-K     | 13.81     | 0.00      |
| Al-K     | 0.48      | 0.13      |
| Si-K     | 1.14      | 0.47      |
| S-K      | 0.11      | 0.00      |
| K-K      | 0.12      | 0.08      |
| Ca-K     | 1.15      | 0.54      |
| Fe-K     | 0.24      | 0.11      |
| Mg-K     | 0.00      | 0.58      |
| Cl-K     | 0.00      | 0.42      |
